# Supplementary material for: Tolvaptan vs. furosemide‐based diuretic regimens in patients hospitalized for heart failure with hyponatremia (AQUA‐AHF)
Source: PubMed Central journal article supplement — ESC Heart Fail. 2020 Jun 16;7(4):1927–34. doi: 10.1002/ehf2.12783 (PMC7373913; doi:10.1002/ehf2.12783), 2020-06-16
Supplement: EHF2-7-1927-s001.pdf [file EHF2-7-1927-s001.pdf]

|                                         | <b>Randomization</b> | <b>8 hours</b> | <b>24 hours</b> | <b>48 hours</b> | <b>72 hours</b> | <b>96 hours or DC</b> |
|-----------------------------------------|----------------------|----------------|-----------------|-----------------|-----------------|-----------------------|
| <b>Vital Statistics</b>                 | X                    | X              | X               | X               | X               | X                     |
| <b>Urine Output<br/>(Fluid Balance)</b> | X                    | X              | X               | X               | X               | X                     |
| <b>Weight</b>                           | X                    |                | X               | X               | X               | X                     |
| <b>Serum Chemistries</b>                | X                    | X              | X               | X               | X               | X                     |
| <b>Cystatin C</b>                       | X                    |                | X               |                 |                 | X                     |
| <b>PRA</b>                              | X                    |                | X               |                 |                 | X                     |
| <b>Copeptin</b>                         | X                    |                | X               |                 |                 | X                     |
| <b>NT-proBNP</b>                        | X                    |                | X               |                 |                 | X                     |
| <b>uNGAL</b>                            | X                    |                | X               | X               | X               |                       |
