# Supplementary figures and images for: Tolvaptan vs. furosemide‐based diuretic regimens in patients hospitalized for heart failure with hyponatremia (AQUA‐AHF)
Source: PubMed Central journal article supplement — ESC Heart Fail. 2020 Jun 16;7(4):1927–34. doi: 10.1002/ehf2.12783 (PMC7373913; doi:10.1002/ehf2.12783), 2020-06-16

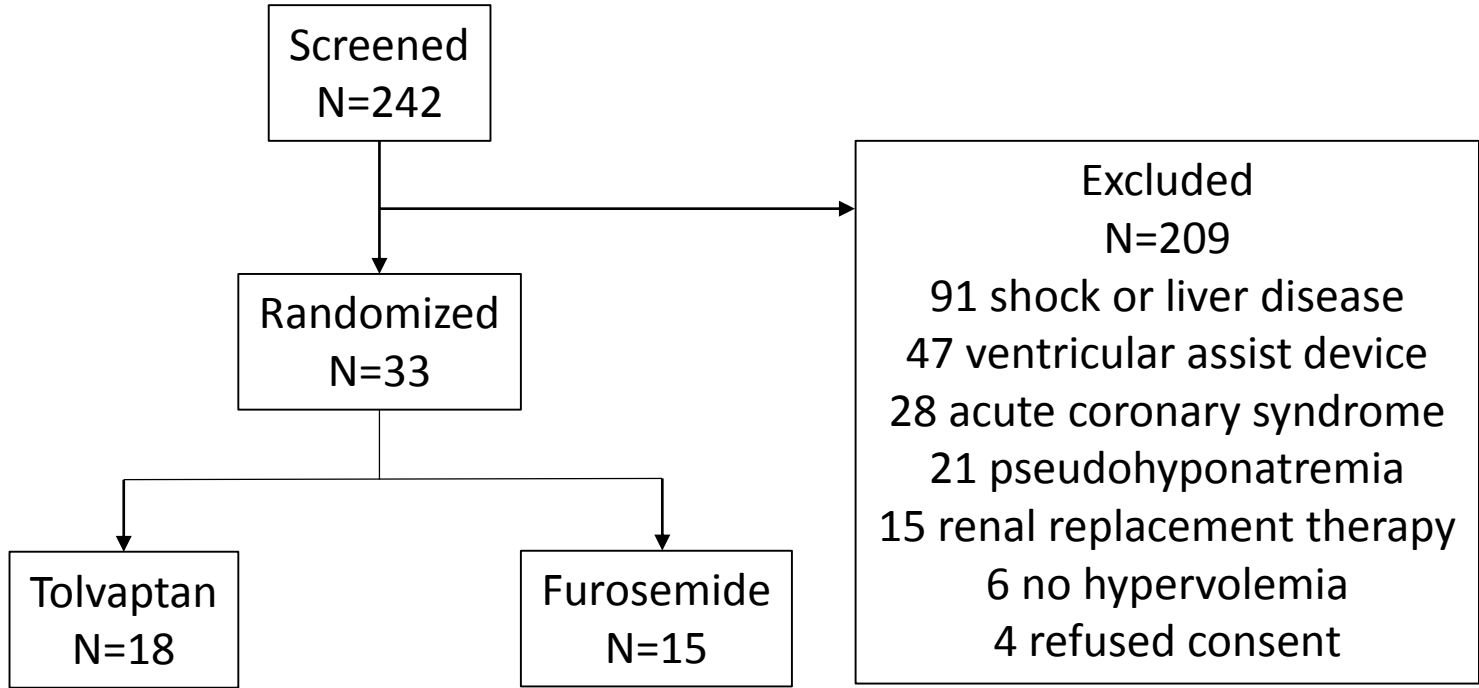

Supplement: EHF2-7-1927-s002.pdf [file EHF2-7-1927-s002.pdf]
